# Supplementary material for: Photoactive layer based on T-shaped benzimidazole dyes used for solar cell: from photoelectric properties to molecular design
Source: PubMed Central journal article supplement (PMC5368572; doi:10.1038/srep45688), 2017-03-28
Supplement: srep45688-s1.pdf [file srep45688-s1.pdf]

**Supporting information**

**Photoactive layer based on T-shaped benzimidazole dyes  
used for solar cell: from photoelectric properties to  
molecular design**

Beibei Xu<sup>a</sup>, Yuanzuo Li<sup>a,\*</sup>, Peng Song<sup>b,c</sup>, Fengcai Ma<sup>c</sup>, Mengtao Sun<sup>b,c,d,\*</sup>

<sup>a</sup> *College of Science, Northeast Forestry University, Harbin 150040, Heilongjiang, China;*

<sup>b</sup> *Beijing Key Laboratory for Magneto-Photoelectrical Composite and Interface Science, School of Mathematics and Physics, University of Science and Technology Beijing, Beijing 100083, China;*

<sup>c</sup> *Department of Physics, Liaoning University, Shenyang 110036, Liaoning, China;*

<sup>d</sup> *Beijing National Laboratory for Condensed Matter Physics, Beijing Key Laboratory for Nanomaterials and Nanodevices, Institute of Physics, Chinese Academy of Sciences, Beijing 100190, People's Republic of China;*

**Content:**

|                                                                                                              |    |
|--------------------------------------------------------------------------------------------------------------|----|
| <b>Figure S1.</b> Electron density difference plots electronic transition for isolated dyes.                 | S2 |
| <b>Figure S2.</b> Calculated vertical dipole moment on TiO <sub>2</sub> surface.                             | S3 |
| <b>Figure S3.</b> The lengths of $\pi$ spacers obtained from the optimized designed dyes.                    | S4 |
| <b>Figure S4.</b> The frontier molecular orbitals for designed dyes.                                         | S5 |
| <b>Figure S5.</b> Computed difference in the centroids of hole and charge (C <sup>+</sup> /C <sup>-</sup> ). | S6 |
| <b>Table S1.</b> Maximum absorption wavelength ( $\lambda_{\text{max}}$ ) data using different methods.      | S7 |
| <b>Table S2.</b> Transition electric dipole moments.                                                         | S7 |
| <b>Table S3.</b> The distances of I-X (X=I, N and S) for isolated dyes.                                      | S7 |
| <b>Table S4.</b> Cartesian coordinates and total energies for 7a, 7b and 7c.                                 | S8 |

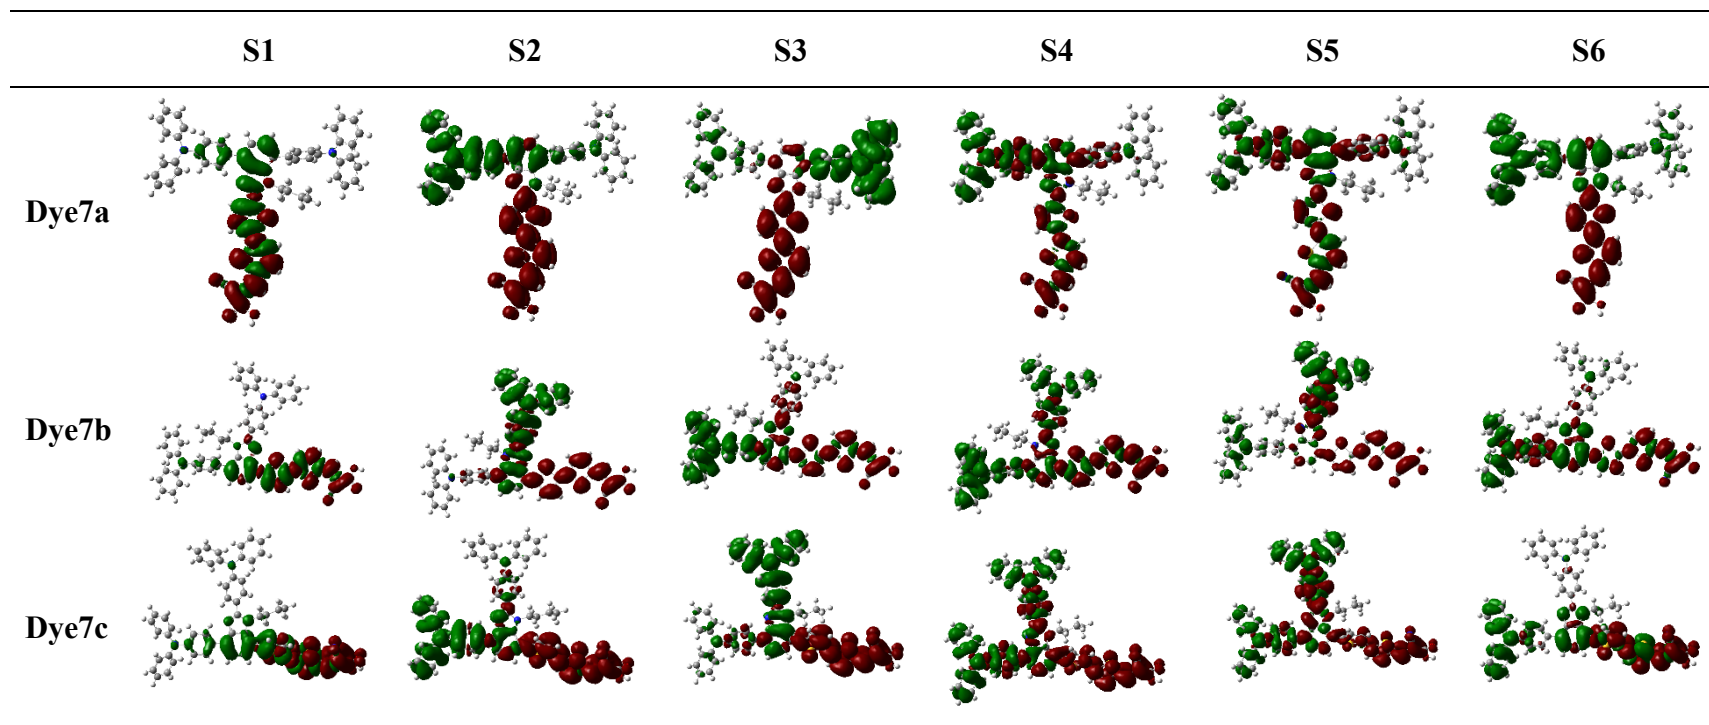

Figure S1. Electron density difference plots electronic transition for isolated dyes.

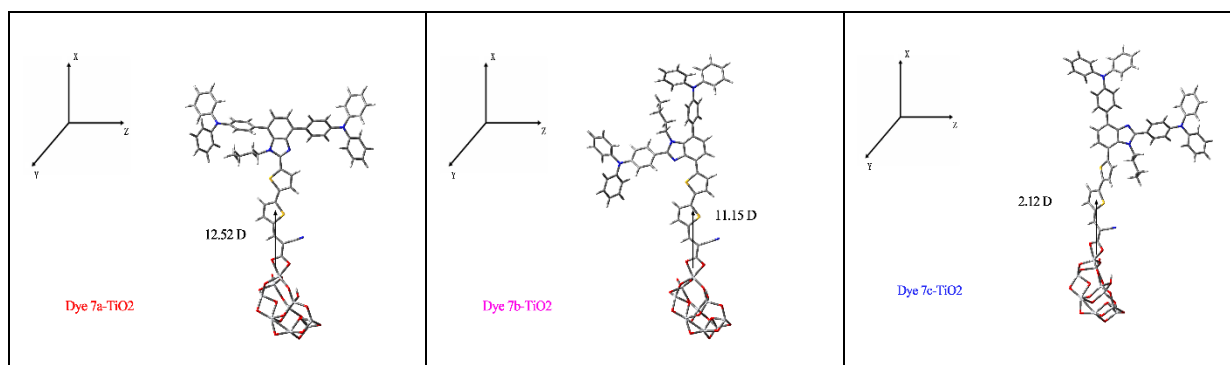

**Figure S2.** Calculated vertical dipole moment on TiO<sub>2</sub> surface.

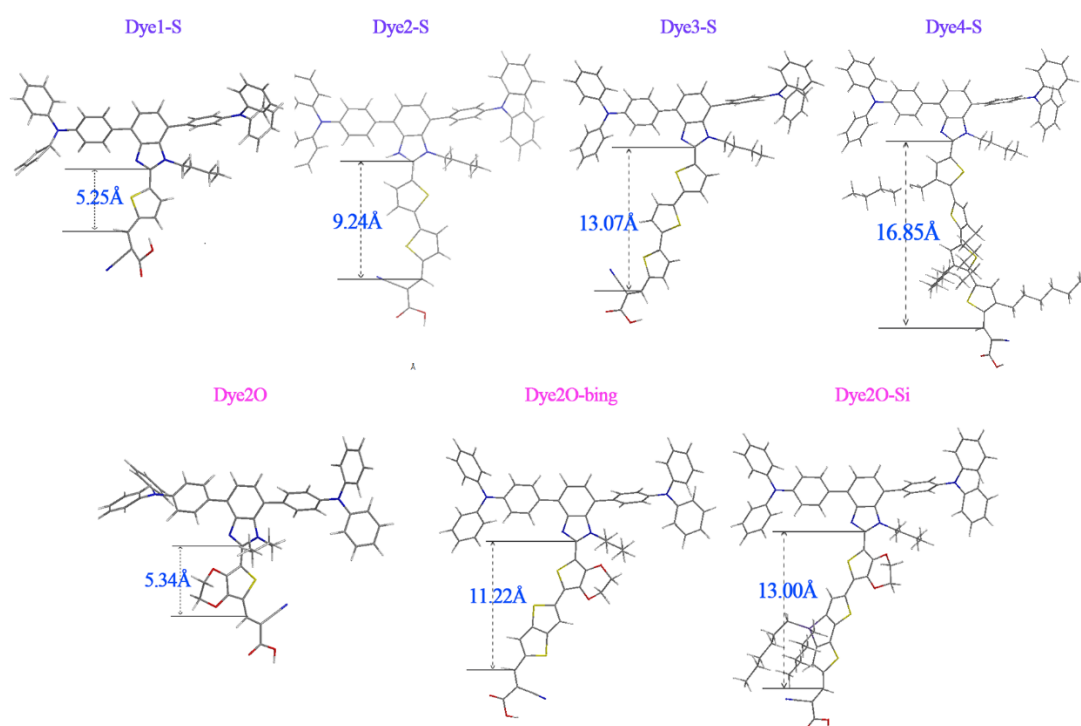

**Figure S3.** The lengths of  $\pi$  spacers obtained from the optimized designed dyes.

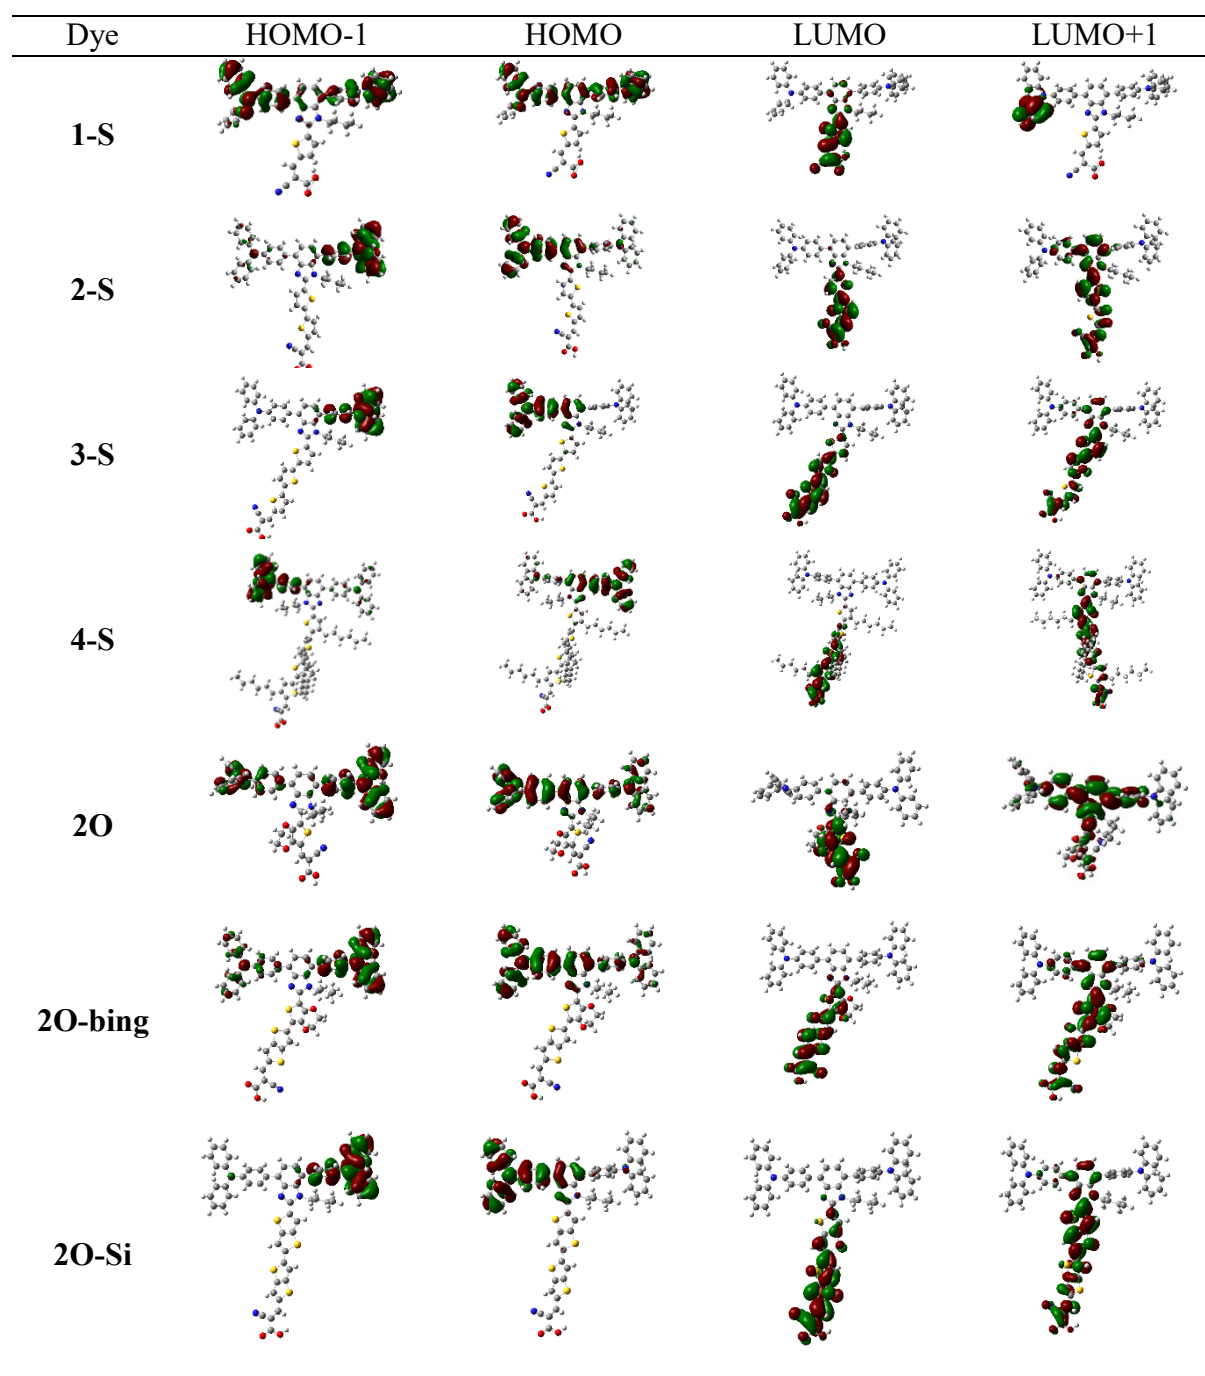

Figure S4. The frontier molecular orbitals for designed dyes.

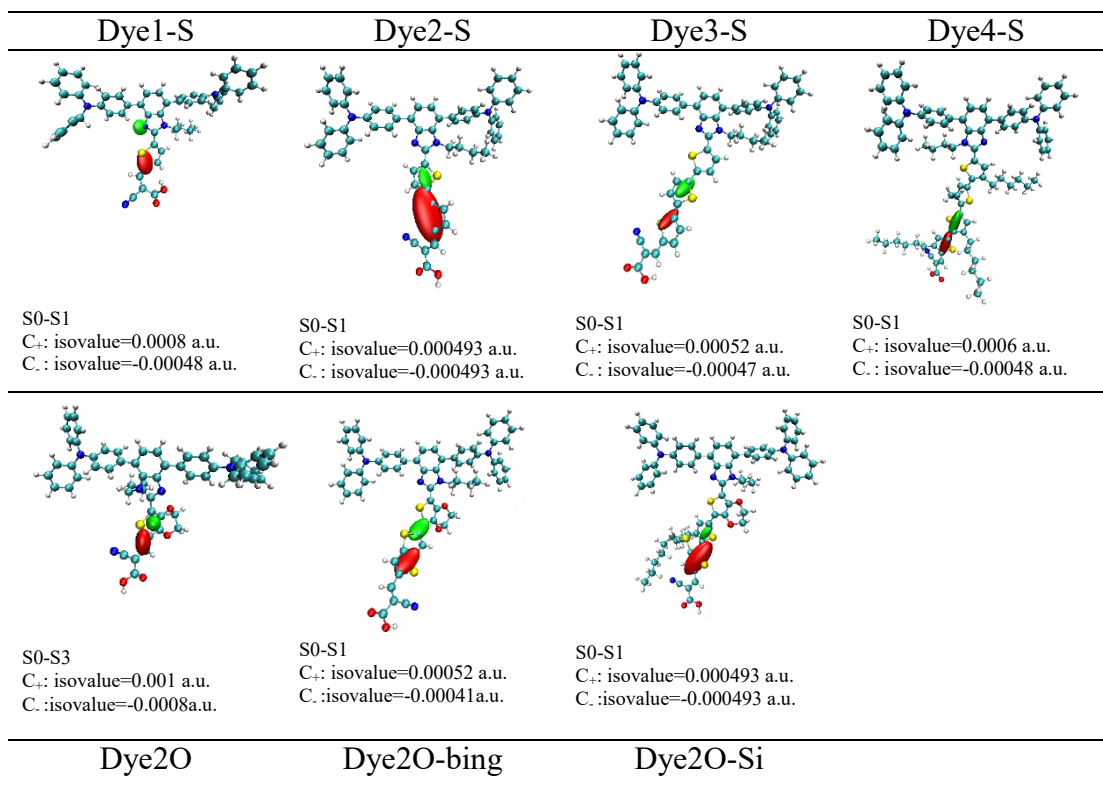

**Figure S5.** Computed difference in the centroids of hole and charge (C<sub>+</sub>/C<sub>-</sub>).

**Table S1.** Maximum absorption wavelength ( $\lambda_{\max}$ ) data using different methods.

|       | B3LYP  | CAM-B3LYP | $\omega$ B97xD | Exp[a] |
|-------|--------|-----------|----------------|--------|
| Dye7a | 519.01 | 451.31    | 439.55         | 428    |
| Dye7b | 515.27 | 473.44    | 461.01         | 469    |
| Dye7c | 475.53 | 423.97    | 404.83         | 418    |

Data [a] was taken from Ref<sup>1</sup>

**Table S2.** Transition electric dipole moments.

|    |    | X       | Y       | Z       |
|----|----|---------|---------|---------|
| 7a | S1 | -1.6494 | -4.5178 | -0.0229 |
|    | S2 | 1.9211  | 0.0452  | -0.0245 |
|    | S3 | 0.0871  | -0.0307 | -0.0369 |
|    | S4 | -2.4930 | 1.3851  | 0.0568  |
|    | S5 | 2.0791  | -0.3125 | 0.1151  |
|    | S6 | 0.0833  | 0.2291  | -0.0125 |
| 7b | S1 | 4.9722  | 1.2553  | 0.0544  |
|    | S2 | 1.1159  | 1.7423  | -0.0108 |
|    | S3 | 1.2000  | 0.3957  | 0.0878  |
|    | S4 | -0.0723 | 1.1073  | 0.0054  |
|    | S5 | -1.3643 | -2.2991 | 0.0044  |
|    | S6 | 1.6566  | -0.2189 | 0.0825  |
| 7c | S1 | 4.7610  | -0.3690 | 0.1188  |
|    | S2 | 0.6508  | -1.3187 | -0.0789 |
|    | S3 | 0.6036  | 1.3460  | -0.0213 |
|    | S4 | 1.5259  | -2.2827 | 0.0432  |
|    | S5 | 2.2113  | 1.7315  | 0.0558  |
|    | S6 | -0.3717 | 0.1594  | -0.2191 |

**Table S3.** The distances of I-X (X=I, N and S) for isolated dyes.

| Dyes...I <sub>2</sub> | CN...I1 | I1...I2 | S <sub>thiophene1</sub> ...I3 | I3...I4 | S <sub>thiophene2</sub> ...I5 | I5...I6 |
|-----------------------|---------|---------|-------------------------------|---------|-------------------------------|---------|
| <b>7a</b>             | 2.700   | 2.877   | 3.352                         | 2.858   | 3.295                         | 2.864   |
| <b>7b</b>             | 2.670   | 2.882   | 3.305                         | 2.864   | 3.160                         | 2.886   |
| <b>7c</b>             | 2.690   | 2.879   | 3.337                         | 2.860   | 3.329                         | 2.862   |



**Table S4.** Cartesian coordinates and total energies

| <b>Dye 7a</b> (total energy= -3494.49877308 a.u) |              |             |             |
|--------------------------------------------------|--------------|-------------|-------------|
| C                                                | 0.33420100   | 0.29858400  | -0.07668600 |
| N                                                | 1.10280800   | -0.77700500 | -0.09632200 |
| N                                                | -1.02005400  | -0.01286500 | -0.06780100 |
| C                                                | 0.25121300   | -1.85207600 | -0.07991000 |
| C                                                | -1.09996000  | -1.40623400 | -0.07235700 |
| C                                                | 0.58381300   | -3.23076500 | -0.06329500 |
| C                                                | -2.18751600  | -2.30628400 | -0.06615600 |
| C                                                | -0.50377700  | -4.10702600 | -0.01801000 |
| C                                                | -1.83229100  | -3.65881500 | -0.02158100 |
| H                                                | -0.31997400  | -5.17542900 | 0.03824900  |
| H                                                | -2.63261000  | -4.39349300 | -0.00381700 |
| C                                                | -2.14155800  | 0.91586400  | 0.08581900  |
| C                                                | -2.52444900  | 1.16769600  | 1.55054700  |
| H                                                | -2.99308000  | 0.50343400  | -0.45543400 |
| H                                                | -1.87920600  | 1.84989600  | -0.41790400 |
| C                                                | -3.71599000  | 2.12457400  | 1.68008800  |
| H                                                | -2.76977900  | 0.20651600  | 2.01912000  |
| H                                                | -1.65971200  | 1.57227600  | 2.09283100  |
| C                                                | -4.11202900  | 2.38693000  | 3.13651900  |
| H                                                | -3.47586600  | 3.07781700  | 1.18764600  |
| H                                                | -4.57459800  | 1.70468200  | 1.13727800  |
| H                                                | -4.96474800  | 3.07207000  | 3.19947100  |
| H                                                | -4.39397300  | 1.45602000  | 3.64266400  |
| H                                                | -3.28270700  | 2.83260400  | 3.69885100  |
| C                                                | -3.63562300  | -1.94871800 | -0.12429800 |
| C                                                | -4.47896700  | -2.18029000 | 0.97327500  |
| C                                                | -4.22299500  | -1.45436200 | -1.30119300 |
| C                                                | -5.84316600  | -1.90541200 | 0.91323800  |
| H                                                | -4.05421800  | -2.56774000 | 1.89565200  |
| C                                                | -5.58787100  | -1.19300900 | -1.37842600 |
| H                                                | -3.60338000  | -1.30103900 | -2.18140900 |
| C                                                | -6.42170900  | -1.40996800 | -0.26739600 |
| H                                                | -6.46800200  | -2.07756500 | 1.78352900  |
| H                                                | -6.01779800  | -0.83105600 | -2.30662700 |
| N                                                | -7.81126200  | -1.14440800 | -0.33942300 |
| C                                                | -8.73953700  | -2.00329600 | 0.31629700  |
| C                                                | -8.29385500  | -0.02996500 | -1.08175000 |
| C                                                | -9.81077500  | -1.46375900 | 1.04525800  |
| C                                                | -8.60088900  | -3.39803700 | 0.23837000  |
| C                                                | -9.41457700  | -0.16407700 | -1.91662100 |
| C                                                | -7.66361300  | 1.22089700  | -0.98500700 |
| C                                                | -10.72577000 | -2.30523300 | 1.67545400  |
| H                                                | -9.92030800  | -0.38589800 | 1.11178500  |
| C                                                | -9.51015500  | -4.23141900 | 0.88739100  |
| H                                                | -7.77973500  | -3.82171700 | -0.33124400 |
| C                                                | -9.89441200  | 0.93219400  | -2.63090300 |

|   |              |              |             |
|---|--------------|--------------|-------------|
| H | -9.90440200  | -1.12907900  | -1.99954300 |
| C | -8.13942800  | 2.30708600   | -1.71707300 |
| H | -6.80318700  | 1.33550500   | -0.33284800 |
| C | -10.57953000 | -3.69224200  | 1.60569100  |
| H | -11.54995700 | -1.87146800  | 2.23564300  |
| H | -9.38846200  | -5.30914300  | 0.81723700  |
| C | -9.25888000  | 2.17238100   | -2.54091900 |
| H | -10.76323800 | 0.81012300   | -3.27233500 |
| H | -7.63954500  | 3.26830100   | -1.62966700 |
| H | -11.29047400 | -4.34487700  | 2.10419500  |
| H | -9.63156400  | 3.02282500   | -3.10453200 |
| C | 1.97512300   | -3.73242200  | -0.09021800 |
| C | 2.28111800   | -4.95328200  | -0.72024100 |
| C | 3.03615500   | -3.04206000  | 0.52484600  |
| C | 3.57279600   | -5.46504200  | -0.73538100 |
| H | 1.49979800   | -5.49505600  | -1.24575900 |
| C | 4.32777200   | -3.55603200  | 0.52966600  |
| H | 2.83954500   | -2.09692400  | 1.01587000  |
| C | 4.62006500   | -4.77623700  | -0.10154800 |
| H | 3.77970100   | -6.39801500  | -1.24975900 |
| H | 5.12158000   | -3.01213700  | 1.03180300  |
| N | 5.93954700   | -5.29707200  | -0.10592200 |
| C | 6.15521200   | -6.69194600  | 0.06501400  |
| C | 7.05010700   | -4.42655100  | -0.28677400 |
| C | 7.10468000   | -7.36877300  | -0.71776000 |
| C | 5.42313500   | -7.41494100  | 1.02107000  |
| C | 8.20938700   | -4.58047000  | 0.49038200  |
| C | 7.00469900   | -3.40212500  | -1.24606700 |
| C | 7.31917700   | -8.73411600  | -0.53912300 |
| H | 7.67029300   | -6.81878300  | -1.46316200 |
| C | 5.63198700   | -8.78352700  | 1.17961400  |
| H | 4.69318500   | -6.89776600  | 1.63571300  |
| C | 9.29954800   | -3.73302000  | 0.30200200  |
| H | 8.24829400   | -5.36574700  | 1.23863800  |
| C | 8.09310900   | -2.54826600  | -1.41445100 |
| H | 6.11414900   | -3.28126900  | -1.85456200 |
| C | 6.58286600   | -9.45215400  | 0.40562900  |
| H | 8.05816000   | -9.24095100  | -1.15439000 |
| H | 5.05628900   | -9.32621600  | 1.92502700  |
| C | 9.24858300   | -2.70963700  | -0.64683800 |
| H | 10.18873900  | -3.86638100  | 0.91276600  |
| H | 8.04065500   | -1.76058400  | -2.16160300 |
| H | 6.74815100   | -10.51770400 | 0.53717400  |
| H | 10.09741600  | -2.04617900  | -0.78558600 |
| C | 0.95009000   | 1.61854300   | -0.10255200 |
| C | 2.29859500   | 1.80915900   | -0.35334300 |
| S | 0.17954600   | 3.15665400   | 0.23160800  |
| C | 2.70670800   | 3.15516000   | -0.29082600 |
| H | 2.95140200   | 0.97444700   | -0.57393500 |
| C | 1.68321500   | 4.03591700   | 0.01458600  |

|   |             |             |             |
|---|-------------|-------------|-------------|
| H | 3.72713200  | 3.47709600  | -0.47057200 |
| C | 1.72797400  | 5.46839200  | 0.15010200  |
| C | 0.68378700  | 6.34256300  | 0.43466100  |
| S | 3.23510400  | 6.33546900  | -0.04463300 |
| C | 1.08800600  | 7.68336300  | 0.49359600  |
| H | -0.33761800 | 6.01403100  | 0.59191000  |
| C | 2.44658700  | 7.88040300  | 0.25775700  |
| H | 0.41579100  | 8.50935800  | 0.70240100  |
| C | 3.07291200  | 9.15981700  | 0.26676300  |
| C | 4.37806800  | 9.52071200  | 0.05488000  |
| H | 2.39175500  | 9.97993200  | 0.47770800  |
| C | 5.40735500  | 8.57611000  | -0.23544700 |
| C | 4.81580600  | 10.93519000 | 0.11242300  |
| N | 6.22632800  | 7.78231100  | -0.47113000 |
| O | 5.95440900  | 11.31301400 | -0.06632500 |
| O | 3.79690700  | 11.79385100 | 0.39119400  |
| H | 4.20247900  | 12.68002900 | 0.40247500  |

**Dye 7b**(total energy= -3494.50524186 a.u)

|   |             |             |             |
|---|-------------|-------------|-------------|
| C | -0.11630700 | 0.55352900  | 0.08023700  |
| N | 0.78582500  | -0.40893700 | 0.01936300  |
| N | -1.41558700 | 0.05959000  | 0.09543900  |
| C | 0.08367000  | -1.58594800 | 0.01147600  |
| C | -1.31282800 | -1.33308500 | 0.04071300  |
| C | 0.61566000  | -2.89559200 | 0.01044900  |
| C | -2.25586400 | -2.38290600 | 0.02981100  |
| C | -0.33137000 | -3.93001500 | 0.05007100  |
| C | -1.70437500 | -3.67424600 | 0.05582700  |
| H | -0.00299400 | -4.96368700 | 0.06512400  |
| H | -2.39040700 | -4.51640000 | 0.04935500  |
| C | -2.64404200 | 0.85475300  | 0.14834200  |
| C | -3.30370900 | 0.88577200  | 1.53335300  |
| H | -3.34696100 | 0.45237700  | -0.58369600 |
| H | -2.38496700 | 1.86497300  | -0.17626700 |
| C | -4.54107900 | 1.79214800  | 1.55652200  |
| H | -3.58720300 | -0.13389000 | 1.81871900  |
| H | -2.57557900 | 1.22665200  | 2.28181800  |
| C | -5.24511600 | 1.80288700  | 2.91723400  |
| H | -4.24995900 | 2.81696800  | 1.28459900  |
| H | -5.24534800 | 1.45919600  | 0.78119900  |
| H | -6.11989000 | 2.46266800  | 2.90831400  |
| H | -5.58637000 | 0.79785600  | 3.19226400  |
| H | -4.57191500 | 2.15295600  | 3.70914400  |
| C | 0.26856600  | 1.97476700  | 0.07714200  |
| C | -0.33830000 | 2.96624900  | 0.86646800  |

|   |              |             |             |
|---|--------------|-------------|-------------|
| C | 1.36286300   | 2.35638700  | -0.72113100 |
| C | 0.11160500   | 4.28182600  | 0.84575100  |
| H | -1.13943800  | 2.70827500  | 1.55069500  |
| C | 1.80800000   | 3.66976700  | -0.75868600 |
| H | 1.85231300   | 1.60174600  | -1.32770100 |
| C | 1.18659700   | 4.66180100  | 0.02358000  |
| H | -0.36103800  | 5.02074700  | 1.48390900  |
| H | 2.63886200   | 3.93813800  | -1.40242500 |
| N | 1.63511600   | 5.99999900  | -0.00975400 |
| C | 0.71086300   | 7.07569300  | 0.12949900  |
| C | 3.02012800   | 6.29402800  | -0.17664500 |
| C | 1.00481000   | 8.15659100  | 0.97465700  |
| C | -0.49709400  | 7.07573500  | -0.58540900 |
| C | 3.42668900   | 7.29459200  | -1.07228300 |
| C | 3.99170300   | 5.59776000  | 0.55873500  |
| C | 0.10740800   | 9.21612900  | 1.09666600  |
| H | 1.93728700   | 8.16010400  | 1.53024300  |
| C | -1.39646900  | 8.13092400  | -0.44342600 |
| H | -0.72278300  | 6.24811100  | -1.25061300 |
| C | 4.77953600   | 7.59425700  | -1.22238800 |
| H | 2.67818700   | 7.83264400  | -1.64543000 |
| C | 5.34350400   | 5.89197700  | 0.38879100  |
| H | 3.68187100   | 4.82919500  | 1.26002800  |
| C | -1.09942000  | 9.20825000  | 0.39421900  |
| H | 0.34950500   | 10.04599700 | 1.75531200  |
| H | -2.32721000  | 8.11699700  | -1.00452100 |
| C | 5.74576400   | 6.89310800  | -0.49791900 |
| H | 5.07873100   | 8.37197900  | -1.92003600 |
| H | 6.08417200   | 5.34440300  | 0.96562200  |
| H | -1.79915100  | 10.03275400 | 0.49658000  |
| H | 6.79970100   | 7.12479700  | -0.62206700 |
| C | -3.73823200  | -2.25457200 | -0.03987500 |
| C | -4.54933200  | -2.77902500 | 0.98041600  |
| C | -4.38372700  | -1.71266300 | -1.16429900 |
| C | -5.93837400  | -2.73944700 | 0.89979100  |
| H | -4.08010700  | -3.20767400 | 1.86204700  |
| C | -5.77178300  | -1.68377200 | -1.26357200 |
| H | -3.78756600  | -1.35118600 | -1.99850000 |
| C | -6.57444200  | -2.19400400 | -0.22850700 |
| H | -6.53849900  | -3.13521700 | 1.71264800  |
| H | -6.24124200  | -1.28176800 | -2.15546200 |
| N | -7.98673400  | -2.17028200 | -0.32561500 |
| C | -8.75875700  | -3.26453500 | 0.15960800  |
| C | -8.64602200  | -1.06755300 | -0.93880400 |
| C | -9.93122200  | -3.03182500 | 0.89533700  |
| C | -8.36521900  | -4.58730800 | -0.09722800 |
| C | -9.68678000  | -1.28166500 | -1.85590200 |
| C | -8.27088300  | 0.24929400  | -0.62906900 |
| C | -10.69498800 | -4.10264500 | 1.35616100  |
| H | -10.23800100 | -2.01091300 | 1.10002600  |

|   |              |             |             |
|---|--------------|-------------|-------------|
| C | -9.12566900  | -5.65186700 | 0.38338100  |
| H | -7.46481500  | -4.77365800 | -0.67407000 |
| C | -10.33872100 | -0.19918200 | -2.44388400 |
| H | -9.97895800  | -2.29761500 | -2.10195200 |
| C | -8.91619700  | 1.32541600  | -1.23545100 |
| H | -7.47758700  | 0.42086800  | 0.09206000  |
| C | -10.29600700 | -5.41778300 | 1.10843000  |
| H | -11.60042100 | -3.90544600 | 1.92407800  |
| H | -8.80739900  | -6.67005500 | 0.17549300  |
| C | -9.95565000  | 1.10954000  | -2.14283700 |
| H | -11.14254900 | -0.38271500 | -3.15194300 |
| H | -8.61395300  | 2.33871100  | -0.98384900 |
| H | -10.89000400 | -6.24990300 | 1.47530400  |
| H | -10.46176100 | 1.95055100  | -2.60801900 |
| C | 2.04854900   | -3.16898100 | -0.02081200 |
| C | 2.66043600   | -4.41299100 | -0.08397300 |
| S | 3.26521700   | -1.90389700 | 0.02724400  |
| C | 4.06644500   | -4.36537400 | -0.09005800 |
| H | 2.10622900   | -5.34283800 | -0.13011400 |
| C | 4.57115100   | -3.07668800 | -0.03281300 |
| H | 4.69290500   | -5.25029800 | -0.13720800 |
| C | 5.94621100   | -2.65595900 | -0.02336400 |
| C | 6.45070900   | -1.35859500 | 0.03334200  |
| S | 7.24592800   | -3.82755800 | -0.08654100 |
| C | 7.84980600   | -1.30968800 | 0.02586100  |
| H | 5.81530600   | -0.48126600 | 0.07903100  |
| C | 8.46711500   | -2.55852900 | -0.03616400 |
| H | 8.42329500   | -0.38892500 | 0.06452400  |
| C | 9.87666300   | -2.74119600 | -0.05423300 |
| C | 10.63703400  | -3.88282500 | -0.11270400 |
| H | 10.43880300  | -1.81188200 | -0.01450000 |
| C | 10.07111100  | -5.19110600 | -0.17024000 |
| C | 12.11540600  | -3.83378200 | -0.11992600 |
| N | 9.58413500   | -6.24826200 | -0.21641000 |
| O | 12.84167000  | -4.80507100 | -0.16981800 |
| O | 12.60629800  | -2.56342800 | -0.06381200 |
| H | 13.57543200  | -2.66479400 | -0.07471700 |

**Dye 7c**(total energy= -3494.50176867 a.u)

|   |             |             |             |
|---|-------------|-------------|-------------|
| C | 0.69028600  | 0.81001600  | -0.11720400 |
| N | 1.54086000  | -0.19489100 | -0.14380000 |
| N | -0.63538600 | 0.38985000  | -0.19593900 |
| C | 0.77833200  | -1.33794800 | -0.22236400 |
| C | -0.60318900 | -1.00177700 | -0.27750600 |
| C | 1.22673700  | -2.68036600 | -0.23336100 |
| C | -1.60211700 | -1.99845300 | -0.38623500 |
| C | 0.22029900  | -3.65285500 | -0.28882400 |
| C | -1.13469400 | -3.32285000 | -0.36365100 |

S13

|   |             |             |             |
|---|-------------|-------------|-------------|
| H | 0.49454600  | -4.70258400 | -0.26016500 |
| H | -1.86547600 | -4.12306300 | -0.43571100 |
| C | -1.81541300 | 1.25619900  | -0.20524900 |
| C | -2.57337400 | 1.28867700  | 1.12839000  |
| H | -2.48465500 | 0.92133700  | -0.99939600 |
| H | -1.47446200 | 2.25779000  | -0.47580800 |
| C | -3.79262800 | 2.21857800  | 1.07315100  |
| H | -2.89553200 | 0.27296300  | 1.38635100  |
| H | -1.89347200 | 1.60809800  | 1.92993400  |
| C | -4.56788600 | 2.26238700  | 2.39377700  |
| H | -3.46748200 | 3.23409000  | 0.80494000  |
| H | -4.46206900 | 1.88779500  | 0.26733100  |
| H | -5.43350900 | 2.93002900  | 2.32316200  |
| H | -4.93539600 | 1.26666700  | 2.66871600  |
| H | -3.93496600 | 2.62130500  | 3.21454100  |
| C | 1.14944800  | 2.20915900  | -0.06630700 |
| C | 0.55331500  | 3.21761400  | 0.70920800  |
| C | 2.30702700  | 2.54386300  | -0.79288700 |
| C | 1.07413600  | 4.50683900  | 0.74145500  |
| H | -0.29918600 | 2.99188700  | 1.34107100  |
| C | 2.82348800  | 3.83144200  | -0.77843700 |
| H | 2.79014500  | 1.77255300  | -1.38334500 |
| C | 2.21243500  | 4.84187800  | -0.01201500 |
| H | 0.60609500  | 5.25932100  | 1.36710800  |
| H | 3.70335700  | 4.06499400  | -1.36830600 |
| N | 2.73151000  | 6.15544100  | 0.00601300  |
| C | 1.85529700  | 7.27483900  | 0.10596800  |
| C | 4.13660700  | 6.37906500  | -0.07813000 |
| C | 2.15271300  | 8.33137700  | 0.98030100  |
| C | 0.69125600  | 7.34180700  | -0.67553800 |
| C | 4.64374600  | 7.38342700  | -0.91679300 |
| C | 5.02967000  | 5.60777900  | 0.68194000  |
| C | 1.30279000  | 9.43288900  | 1.06467700  |
| H | 3.05090400  | 8.28315700  | 1.58786700  |
| C | -0.16203100 | 8.43883400  | -0.57134700 |
| H | 0.46251100  | 6.53250800  | -1.36183600 |
| C | 6.01666800  | 7.61311200  | -0.98589600 |
| H | 3.95741100  | 7.97947400  | -1.50992100 |
| C | 6.40233800  | 5.83185200  | 0.59162800  |
| H | 4.64295900  | 4.83522800  | 1.33904300  |
| C | 0.13916300  | 9.49200900  | 0.29499700  |
| H | 1.54721600  | 10.24306900 | 1.74660400  |
| H | -1.05918100 | 8.47612500  | -1.18371800 |
| C | 6.90433200  | 6.83716800  | -0.23763300 |
| H | 6.39346600  | 8.39502000  | -1.63997600 |
| H | 7.08072400  | 5.22513000  | 1.18559000  |
| H | -0.52416900 | 10.34906000 | 0.36810000  |
| H | 7.97430500  | 7.01395000  | -0.29947600 |
| C | 2.65554800  | -3.06038500 | -0.18747500 |
| C | 3.10332700  | -4.23395200 | -0.82299600 |

|   |              |             |             |
|---|--------------|-------------|-------------|
| C | 3.61465900   | -2.29618900 | 0.50384500  |
| C | 4.43362900   | -4.63181500 | -0.77154300 |
| H | 2.40508400   | -4.82759900 | -1.40603700 |
| C | 4.94315100   | -2.69813700 | 0.57635500  |
| H | 3.30863200   | -1.38075100 | 0.99457300  |
| C | 5.37731700   | -3.87214800 | -0.06067900 |
| H | 4.75136000   | -5.52933700 | -1.29246800 |
| H | 5.65605400   | -2.09971000 | 1.13462600  |
| N | 6.73603000   | -4.27559700 | 0.00380600  |
| C | 7.06564200   | -5.65004300 | 0.15758100  |
| C | 7.77213900   | -3.30579700 | -0.09322000 |
| C | 8.12154800   | -6.21724200 | -0.57441700 |
| C | 6.34181600   | -6.46166400 | 1.04646500  |
| C | 8.89616300   | -3.37664100 | 0.74560700  |
| C | 7.68783000   | -2.26396000 | -1.03098100 |
| C | 8.44689700   | -7.56250000 | -0.41195200 |
| H | 8.68225400   | -5.59814600 | -1.26740200 |
| C | 6.66312300   | -7.81013900 | 1.18824100  |
| H | 5.53014400   | -6.02841000 | 1.62214500  |
| C | 9.91412400   | -2.43091600 | 0.63844600  |
| H | 8.96505100   | -4.17531200 | 1.47732700  |
| C | 8.70229400   | -1.31263700 | -1.11811500 |
| H | 6.82477900   | -2.20553900 | -1.68635400 |
| C | 7.71896700   | -8.36934700 | 0.46516600  |
| H | 9.26698700   | -7.98432500 | -0.98730800 |
| H | 6.09200600   | -8.42277300 | 1.88110000  |
| C | 9.82361800   | -1.39113000 | -0.28937100 |
| H | 10.77682900  | -2.50152900 | 1.29593800  |
| H | 8.61983400   | -0.51314400 | -1.84987700 |
| H | 7.97122600   | -9.41925600 | 0.58384200  |
| H | 10.61601400  | -0.65190800 | -0.36521300 |
| C | -3.04972500  | -1.77391800 | -0.54718700 |
| C | -3.74111100  | -1.14112500 | -1.55901400 |
| S | -4.17527300  | -2.47448800 | 0.60066700  |
| C | -5.14987600  | -1.20436500 | -1.42182800 |
| H | -3.24362400  | -0.68725500 | -2.40910700 |
| C | -5.56690200  | -1.90038100 | -0.30279900 |
| H | -5.84027500  | -0.77894300 | -2.14300300 |
| C | -6.91158600  | -2.16673200 | 0.14581000  |
| C | -7.33098600  | -3.04816800 | 1.13524700  |
| S | -8.27094700  | -1.32636300 | -0.56402500 |
| C | -8.72250900  | -3.05592600 | 1.31181100  |
| H | -6.64702800  | -3.67464800 | 1.69698500  |
| C | -9.40902400  | -2.18512000 | 0.46939300  |
| H | -9.23729200  | -3.68425000 | 2.03154400  |
| C | -10.82566600 | -2.03329500 | 0.47404200  |
| C | -11.64466300 | -1.23360200 | -0.27947600 |
| H | -11.33123400 | -2.66142600 | 1.20270600  |
| C | -11.15358600 | -0.34429300 | -1.28162100 |
| C | -13.11588500 | -1.23635900 | -0.10256000 |

|   |              |             |             |
|---|--------------|-------------|-------------|
| N | -10.72374200 | 0.37288500  | -2.09234300 |
| O | -13.88857700 | -0.55144200 | -0.73900000 |
| O | -13.53124400 | -2.09979600 | 0.86427300  |
| H | -14.50181300 | -2.01374500 | 0.88735200  |



1. Bodedla, G. B., Thomas, K. R. J., Fan, M. S. & Ho, K. C. Benzimidazole-Branched Isomeric Dyes: Effect of Molecular Constitution on Photophysical, Electrochemical, and Photovoltaic Properties. *J. Org. Chem.* **81**, 640-653 (2016).
